# Supplementary material for: Discovery of Novel Resistance Mechanisms of Vibrio parahaemolyticus Biofilm against Aminoglycoside Antibiotics
Source: MDPI journal article supplement (doi:10.3390/antibiotics12040638), 2023-03-24
Supplement: s1 [file s1]

Supplementary

# Discovery of Novel Resistance Mechanisms of *Vibrio parahaemolyticus* Biofilm against Aminoglycoside Antibiotics

Cuifang Tian <sup>1,†</sup>, Mengqi Yuan <sup>1,†</sup>, Qian Tao <sup>1</sup>, Tianming Xu <sup>1</sup>, Jing Liu <sup>1</sup>, Zhenhua Huang <sup>1</sup>, Qian Wu <sup>1</sup>, Yingjie Pan <sup>1,2,3</sup>, Yong Zhao <sup>1,2,3,\*</sup> and Zhaohuan Zhang <sup>1,\*</sup>

**Table S1** The OD<sub>600</sub> value of *V. parahaemolyticus* biofilm

|        | OD        | OD <sub>c</sub> | 2OD <sub>c</sub> | 4OD <sub>c</sub> |
|--------|-----------|-----------------|------------------|------------------|
| VPC16  | 0.36±0.08 | 0.136±0.02      | 0.272±0.02       | 0.544±0.02       |
| VPC17  | 1.23±0.03 | 0.136±0.02      | 0.272±0.02       | 0.544±0.02       |
| VPC18  | 0.70±0.13 | 0.136±0.02      | 0.272±0.02       | 0.544±0.02       |
| VPC19  | 0.74±0.02 | 0.136±0.02      | 0.272±0.02       | 0.544±0.02       |
| VPC20  | 1.14±0.02 | 0.136±0.02      | 0.272±0.02       | 0.544±0.02       |
| VPC21  | 3.40±1.13 | 0.136±0.02      | 0.272±0.02       | 0.544±0.02       |
| VPC22  | 0.75±0.11 | 0.136±0.02      | 0.272±0.02       | 0.544±0.02       |
| VPC25  | 0.73±0.18 | 0.136±0.02      | 0.272±0.02       | 0.544±0.02       |
| VPC26  | 0.95±0.44 | 0.136±0.02      | 0.272±0.02       | 0.544±0.02       |
| VPC27  | 0.57±0.17 | 0.136±0.02      | 0.272±0.02       | 0.544±0.02       |
| VPC28  | 1.25±0.28 | 0.136±0.02      | 0.272±0.02       | 0.544±0.02       |
| VPC29  | 0.43±0.17 | 0.136±0.02      | 0.272±0.02       | 0.544±0.02       |
| VPC32  | 1.04±0.17 | 0.136±0.02      | 0.272±0.02       | 0.544±0.02       |
| VPC33  | 0.45±0.01 | 0.136±0.02      | 0.272±0.02       | 0.544±0.02       |
| VPC34  | 0.71±0.03 | 0.136±0.02      | 0.272±0.02       | 0.544±0.02       |
| VPC35  | 0.88±0.26 | 0.136±0.02      | 0.272±0.02       | 0.544±0.02       |
| VPD8   | 0.35±0.08 | 0.193±0.01      | 0.386±0.01       | 0.772±0.01       |
| VPD14  | 1.15±0.48 | 0.193±0.01      | 0.386±0.01       | 0.772±0.01       |
| VPD18  | 0.85±0.14 | 0.193±0.01      | 0.386±0.01       | 0.772±0.01       |
| VPD33  | 0.70±0.02 | 0.193±0.01      | 0.386±0.01       | 0.772±0.01       |
| VPD34  | 0.51±0.01 | 0.193±0.01      | 0.386±0.01       | 0.772±0.01       |
| VPD57  | 0.40±0.02 | 0.193±0.01      | 0.386±0.01       | 0.772±0.01       |
| VPD58  | 0.39±0.04 | 0.193±0.01      | 0.386±0.01       | 0.772±0.01       |
| VPD61  | 1.09±0.06 | 0.193±0.01      | 0.386±0.01       | 0.772±0.01       |
| VPR101 | 0.96±0.03 | 0.193±0.01      | 0.386±0.01       | 0.772±0.01       |
| VPR103 | 0.26±0.03 | 0.193±0.01      | 0.386±0.01       | 0.772±0.01       |
| VPR104 | 0.43±0.22 | 0.193±0.01      | 0.386±0.01       | 0.772±0.01       |

|        |           |            |            |            |
|--------|-----------|------------|------------|------------|
| VPR105 | 0.42±0.74 | 0.193±0.01 | 0.386±0.01 | 0.772±0.01 |
| VPR106 | 0.37±0.29 | 0.193±0.01 | 0.386±0.01 | 0.772±0.01 |
| VPR108 | 0.50±0.04 | 0.193±0.01 | 0.386±0.01 | 0.772±0.01 |
| VPR110 | 0.49±0.07 | 0.193±0.01 | 0.386±0.01 | 0.772±0.01 |
| VPR111 | 0.23±0.01 | 0.193±0.01 | 0.386±0.01 | 0.772±0.01 |

Notes: The values are mean value ± standard deviation.

**Table S2** Details of primer pairs

| Target Genes | Primer Sequence           | Expected Size<br>(bp) |
|--------------|---------------------------|-----------------------|
| <i>pckA</i>  | TCGGTAGGACGAATGAACATG     | 108                   |
|              | TGACGGTTATTGTGGTGCTAA     |                       |
| <i>gspC</i>  | GCAGGATTATCAAGCAGACC      | 102                   |
|              | TATCGCAATAAATAGGCAAGTAAG  |                       |
| <i>gspD</i>  | GTGACTCAGATACTGGTGCTAT    | 187                   |
|              | ATACTTGGAGAAGATAGGATGTTTG |                       |
| <i>gspE</i>  | TACGCTCTGTTCTGACTGTAAAG   | 270                   |
|              | CTTAGACCATCACTGCGAATACTT  |                       |
| <i>gspG</i>  | GGTGGTTACATCAAGCGTCTT     | 165                   |
|              | GAAGTCTTGCATGTTCCAGTTG    |                       |
| <i>gspH</i>  | AACCACCGCAAGTCTTCATT      | 169                   |
|              | GCATTTCGCATCCTCTTCCA      |                       |
| <i>gspL</i>  | TGCGGGCGTTTTGTTAGTG       | 228                   |
|              | GCAGCAAGCCAAGACAACAT      |                       |
| <i>parE</i>  | CGTTGAAGCGGGTCATATCTAT    | 280                   |
|              | ACCTAGCAGCATGTCCATCA      |                       |
| <i>parC</i>  | GAGCGTGACCTAGTACCAAGT     | 204                   |
|              | GTGCGACTCAAGCGAGTAAC      |                       |
